# Supplementary material
Source: publisher site journal article supplement (https://neobiota.pensoft.net/article/79597/download/suppl/32/)
Supplement: Supplementary file 1

Supplemental Table 2: Spearman's test results for between reviewer correlation (r). Results presented for total rubric scores, dimensions and domain subtotals
Total Scores	row	column	r	p
1	Charles	Leif	0.82	7.29E-11
2	Charles	Zoe	0.74	3.92E-08
3	Leif	Zoe	0.72	1.37E-07
Dimensions	row	column	r	p
1	Leif	Charles	0.93	1.11E-15
2	Leif	Zoe	0.78	3.73E-08
3	Charles	Zoe	0.74	3.19E-07
Data Collection	row	column	r	p
1	Leif	Charles	0.73	4.58E-08
2	Leif	Zoe	0.76	8.94E-09
3	Charles	Zoe	0.64	6.95E-06
Engagement	row	column	r	p
1	Leif	Charles	0.71	2.42E-07
2	Leif	Zoe	0.65	3.50E-06
3	Charles	Zoe	0.7	4.20E-07
Reporting	row	column	r	p
1	Leif	Charles	0.73	4.58E-08
2	Leif	Zoe	0.76	8.94E-09
3	Charles	Zoe	0.64	6.95E-06
Identification	row	column	r	p
1	Leif	Charles	0.77	4.55E-09
2	Leif	Zoe	0.59	4.19E-05
3	Charles	Zoe	0.75	2.23E-08
